# Supplementary material for: Canine separation-related behaviour at six months of age: Dog, owner and early-life risk factors identified using the ‘Generation Pup’ longitudinal study
Source: PubMed Central journal article supplement (PMC11655275; doi:10.1017/awf.2024.56), 2024-12-16
Supplement: S0962728624000563sup001.pdf [file S0962728624000563sup001.pdf]

Canine separation-related behaviour at six months of age: Dog, owner and early-life risk factors identified using the ‘Generation Pup’ longitudinal study

Fiona C Dale <https://orcid.org/0009-0006-3948-7938>, Charlotte C Burn, Jane Murray, and Rachel Casey

**Table S1. Recategorisation of categories of questions from the Generation Pup questionnaires for univariate and multivariate statistical analysis (variables which reached  $P < 0.200$  shown)**

| Variable name/question                                     | Questionnaire/ Time-point | Original categories in Generation Pup                                                                                        | New Variable Name | Categories used for analysis                                                                                                                                   |
|------------------------------------------------------------|---------------------------|------------------------------------------------------------------------------------------------------------------------------|-------------------|----------------------------------------------------------------------------------------------------------------------------------------------------------------|
| <b>My puppy is a/an</b>                                    | About My Puppy            | List of dog breeds presented to owners                                                                                       | Dog Breed         | <ul style="list-style-type: none"> <li>• Crossbreeds</li> <li>• Labrador Retriever</li> <li>• Other pure breeds</li> </ul>                                     |
| <b>Derived Kennel Club classification from breed names</b> | About My Puppy            | None and Unknown<br>Working<br>Pastoral<br>Hound<br>Terrier<br>Utility<br>Toy<br>Gundog                                      | Kennel Club Group | <ul style="list-style-type: none"> <li>• None and Unknown</li> <li>• Working, Hound, Terrier, Utility and Toy</li> <li>• Pastoral</li> <li>• Gundog</li> </ul> |
| <b>I am aged...</b>                                        | About Me                  | 16-24 years<br>25-34 years<br>35-44 years<br>45-54 years<br><br>55-64 years<br><br>65 years and older<br>Prefer not to state | Owner Age         | <ul style="list-style-type: none"> <li>• 16-34 years</li> <li>• 35 years and older</li> </ul>                                                                  |

|                                                                                                                              |                    |                                                                                                                                                     |                                                    |                                                                                                                                                                                                                                               |
|------------------------------------------------------------------------------------------------------------------------------|--------------------|-----------------------------------------------------------------------------------------------------------------------------------------------------|----------------------------------------------------|-----------------------------------------------------------------------------------------------------------------------------------------------------------------------------------------------------------------------------------------------|
| <b>My marital status is...</b>                                                                                               | About Me           | Single<br>Common law<br>partnered/Co<br>habiting<br>Married<br>Civil<br>partnered<br>Divorced/Sep<br>arated<br>Widowed<br>Prefer not to<br>state    | Marital<br>Status<br>Combined                      | <ul style="list-style-type: none"> <li>• Single &amp; Widowed</li> <li>• Common Law</li> <li>• Married &amp; Civil Partnered</li> <li>• Divorced/Separated</li> </ul>                                                                         |
| <b>I live in a...</b>                                                                                                        | About My Household | City or urban area<br>Suburban area<br>Village or small town<br>Rural area (such as small village or hamlet)<br>In a remote/isolated area<br>Other  | Home Location<br>Combination                       | <ul style="list-style-type: none"> <li>• City or urban area</li> <li>• Suburban area</li> <li>• Village or small town or</li> <li>• Rural or remote</li> </ul>                                                                                |
| <b>The longest period that my puppy has been left at home without human company (during the day/evening or night) was...</b> | ≤16 weeks          | Less than 1 hour<br>One or more hours but less than three hours<br>Three or more hours but less than six hours<br>Six or more hours<br>I don't know | Maximum Period Left at ≤16 weeks combination       | <ul style="list-style-type: none"> <li>• Not Left Alone</li> <li>• Less than 1 hour</li> <li>• One or more hours but less than three hours</li> <li>• Three or more hours but less than six hours and</li> <li>• Six or more hours</li> </ul> |
| <b>The type of enclosed space used for my puppy was...</b>                                                                   | ≤16 weeks          | A crate or indoor kennel<br>A utility room or kitchen area which may be shut off from the rest of the house<br>A garage/out-building                | Type of Enclosed Space<br>Combination at ≤16 weeks | <ul style="list-style-type: none"> <li>• Not enclosed</li> <li>• Any crate experience</li> <li>• Other (e.g. utility room or kitchen area only, play pen, area of house sectioned off by gate etc)</li> </ul>                                 |

|                                                                                |           | An outdoor kennel<br>Other (please specify)                                                                                                                                                                                 |                                                 |                                                                                                                                                                                                                                 |
|--------------------------------------------------------------------------------|-----------|-----------------------------------------------------------------------------------------------------------------------------------------------------------------------------------------------------------------------------|-------------------------------------------------|---------------------------------------------------------------------------------------------------------------------------------------------------------------------------------------------------------------------------------|
| <b>I have used an enclosed space for my puppy...</b>                           | ≤16 weeks | To make sure he/she had a safe space<br>To separate him/her from other household pets<br>To keep him/her calm/quiet<br>To keep him/her still if he/she has been naughty<br>To house train him/her<br>Other (please specify) | Reason Enclosed at ≤16 weeks                    | <ul style="list-style-type: none"> <li>• Not enclosed</li> <li>• Calm and/or safe only (plus sleep only) and house train</li> <li>• Different combinations but include separate from others or keep still if naughty</li> </ul> |
| <b>My puppy goes in the enclosed space...</b>                                  | ≤16 weeks | Occasionally<br>Regularly, in the day, for less than 3 hours total<br>Regularly, in the day, for 3 or more hours in total<br>Overnight                                                                                      | Frequency Enclosed at ≤16 weeks day/night       | <ul style="list-style-type: none"> <li>• Not enclosed</li> <li>• Day Only (not mention overnight)</li> <li>• Combinations of time but experience of being enclosed overnight</li> </ul>                                         |
| <b>My puppy sleeps during the night-time for a total of approximately ....</b> | ≤16 weeks | Owner entered maximum number of hours                                                                                                                                                                                       | Maximum Hours Sleep at Night at ≤16 weeks       | <ul style="list-style-type: none"> <li>• 6 hours to 8 hours</li> <li>• 9 hours</li> <li>• 10 hours and over</li> <li>• Unspecified</li> </ul>                                                                                   |
| <b>My puppy sleeps during the night-time for a total of approximately ....</b> | ≤16 weeks | Owner entered minimum number of hours                                                                                                                                                                                       | Minimum Hours Sleep at Night at ≤16 weeks       | <ul style="list-style-type: none"> <li>• 0 hours - 4 hours</li> <li>• 5 hours</li> <li>• 6 hours</li> <li>• 7 hours</li> <li>• 8 hours or more</li> <li>• Unspecified</li> </ul>                                                |
| <b>My puppy sleeps during the day-time for a total of</b>                      | ≤16 weeks | Owner entered maximum number of hours                                                                                                                                                                                       | Maximum Hours Sleep During the Day at ≤16 weeks | <ul style="list-style-type: none"> <li>• 2 hours - 3 hours</li> <li>• 4 hours</li> <li>• 5 hours</li> <li>• 6 hours</li> <li>• 7 hours and over</li> </ul>                                                                      |

|                                                                |           |                                                                                                                                                                                                                                                                                                                                                                                            |                                             |                                                                                                                                                                                                                                                                                                                                                                                                                                                                                                                   |
|----------------------------------------------------------------|-----------|--------------------------------------------------------------------------------------------------------------------------------------------------------------------------------------------------------------------------------------------------------------------------------------------------------------------------------------------------------------------------------------------|---------------------------------------------|-------------------------------------------------------------------------------------------------------------------------------------------------------------------------------------------------------------------------------------------------------------------------------------------------------------------------------------------------------------------------------------------------------------------------------------------------------------------------------------------------------------------|
| approximately<br>....                                          |           |                                                                                                                                                                                                                                                                                                                                                                                            |                                             | <ul style="list-style-type: none"> <li>• Unspecified</li> </ul>                                                                                                                                                                                                                                                                                                                                                                                                                                                   |
| <b>At the moment, my puppy is settled to sleep at night...</b> | ≤16 weeks | <p>By having him/her in a bedroom with human company</p> <p>By sleeping in another room in the house with him/her (for example sleeping in the living room)</p> <p>By waiting for him/her to be asleep before going to bed in a different room</p> <p>By leaving him/her in a room/area without human company</p> <p>By leaving him/her in an outbuilding (for example kennel, stable)</p> | Method of settling at ≤16 weeks combination | <ul style="list-style-type: none"> <li>• Sleeping in room</li> <li>• (By having him/her in a bedroom with human company)</li> <li>• By sleeping in another room in the house with him/her (for example sleeping in the living room)</li> <li>• By waiting for him/her to be asleep before going to bed in a different room)</li> <li>• Leaving Alone</li> <li>• (By leaving him/her in a room/area without human company)</li> <li>• By leaving him/her in an outbuilding (for example kennel, stable)</li> </ul> |
| <b>At night my puppy sleeps...</b>                             | ≤16 weeks | <p>In a kennel/crate</p> <p>On a dog bed</p> <p>On a chair/other furniture</p> <p>On a person's bed</p> <p>On the floor</p> <p>Other (please specify)</p>                                                                                                                                                                                                                                  | Sleep Location at ≤16 weeks combination     | <ul style="list-style-type: none"> <li>• Anything not including kennel/crate or person's bed (on a dog bed, on a chair/furniture, on the floor)</li> <li>• Kennel/crate plus other locations</li> <li>• Kennel/crate only</li> <li>• Person's bed mentioned (with/without other locations)</li> </ul>                                                                                                                                                                                                             |
| <b>My puppy's housetraining...</b>                             | ≤16 weeks | Is complete, my puppy no longer has                                                                                                                                                                                                                                                                                                                                                        | Housetraining Progression                   | <ul style="list-style-type: none"> <li>• Zero to three accidents a week</li> </ul>                                                                                                                                                                                                                                                                                                                                                                                                                                |

|                                                                       |           |                                                                                                                                                                                                                                                                                                            |                                                                   |                                                                                                                                                                                                                                                    |
|-----------------------------------------------------------------------|-----------|------------------------------------------------------------------------------------------------------------------------------------------------------------------------------------------------------------------------------------------------------------------------------------------------------------|-------------------------------------------------------------------|----------------------------------------------------------------------------------------------------------------------------------------------------------------------------------------------------------------------------------------------------|
|                                                                       |           | any accidents indoors<br>Is ongoing, and there are fewer than four accidents a week<br>Is ongoing, but there are still four or more accidents per week                                                                                                                                                     | at ≤16 weeks combination                                          | <ul style="list-style-type: none"> <li>• Is ongoing, but there are still four or more accidents per week</li> </ul>                                                                                                                                |
| <b>I am training, or want to train my puppy to toilet by...</b>       | ≤16 weeks | Taking/letting him/her outside regularly<br>Telling him/her off when he/she toilets inside<br>Praising him/her when he/she toilets in the correct place<br>Using puppy pads/newspapers on the floor to show areas where he/she may toilet<br>I haven't started this training yet<br>Other (please specify) | House Train Method at ≤16 weeks combination                       | <ul style="list-style-type: none"> <li>• Taken out regularly and/or praised</li> <li>• Telling off mentioned and/or praise not mentioned</li> </ul>                                                                                                |
| <b>At the party/class, I was given information or shown how to...</b> | ≤16 weeks | Given information about this, but NOT shown how to do this<br>Shown how to do this, but NOT given separate information about this                                                                                                                                                                          | Puppy Training Class House Training Info at ≤16 weeks Combination | <ul style="list-style-type: none"> <li>• No classes</li> <li>• Given information about this, but NOT shown how to do this</li> <li>• Shown how to do this, AND/OR given separate information about this</li> <li>• This was not covered</li> </ul> |

|                                                                                     |           |                                                                                                                                                                                                                                                                                                                                                                         |                                                         |                                                                                                                                                                                                                        |
|-------------------------------------------------------------------------------------|-----------|-------------------------------------------------------------------------------------------------------------------------------------------------------------------------------------------------------------------------------------------------------------------------------------------------------------------------------------------------------------------------|---------------------------------------------------------|------------------------------------------------------------------------------------------------------------------------------------------------------------------------------------------------------------------------|
|                                                                                     |           | Shown how to do this AND given separate information about this This was not covered                                                                                                                                                                                                                                                                                     |                                                         |                                                                                                                                                                                                                        |
| <b>When training my puppy to do a new behaviour, I use the following rewards...</b> | ≤16 weeks | Verbal praise (for example 'good boy/girl')<br>Physical praise (for example pat/stroke/cuddle)<br>A toy<br>A ball<br>A clicker<br>Some of his/her normal dog food<br>A dog food other than his/her own kibble/biscuit<br>Dog food treats<br>Human food (for example cheese/sausage)<br>None/no other rewards are used<br>Training not started<br>Other (please specify) | Training Reward – Kibble or dog food treat at ≤16 weeks | <ul style="list-style-type: none"> <li>• No use of kibble and/or dog food treats</li> <li>• Kibble and/or dog food treats</li> </ul>                                                                                   |
| <b>When correcting my puppy for doing something wrong, I would...</b>               | ≤16 weeks | Tell him/her off<br>Use a physical reprimand/correction (for example smack or tap him/her on                                                                                                                                                                                                                                                                            | Correction Method at ≤16 weeks combination              | <ul style="list-style-type: none"> <li>• Move away, withhold treats, ignore, don't use anything, other(e.g. Show him/her correct behaviour, redirect behaviour)</li> <li>• Tell off, physical, distraction,</li> </ul> |

|                                                                                                                                                              |          |                                                                                                                                                                                                                                                                                                         |                                                        |                                                                                                                                                       |
|--------------------------------------------------------------------------------------------------------------------------------------------------------------|----------|---------------------------------------------------------------------------------------------------------------------------------------------------------------------------------------------------------------------------------------------------------------------------------------------------------|--------------------------------------------------------|-------------------------------------------------------------------------------------------------------------------------------------------------------|
|                                                                                                                                                              |          | nose or bottom)<br>Distraction (for example rattle can/loud noise/water spray)<br>Withhold treats<br>Ignore him/her<br>Use physical manipulation (for example putting him/her into a sit or pushing him/her if he/she jumps up)<br>Hold him/her still<br>I don't use anything<br>Other (please specify) |                                                        | manipulation, hold still (may use response categories too (e.g. move away, ignore etc)                                                                |
| <b>In total, the number of nights my puppy has been separated from me, and all household members (if applicable) since he/she came to live with me is...</b> | 6 months | Not stayed away<br>One night<br>2-5 nights<br>6-10 nights<br>11-15 nights<br>More than 15 nights<br>I don't know/can't remember                                                                                                                                                                         | Nights separated at six-months combination             | <ul style="list-style-type: none"> <li>• Not stayed away</li> <li>• One to five nights</li> <li>• 6-10 nights</li> <li>• 11 or more nights</li> </ul> |
| <b>In general, during the last seven days, when I/we were relaxing at home with my puppy and he/she behaved in a way that I/we would like</b>                | 6 months | Verbally praise him/her (for example saying 'good dog')<br>Play with him/her<br>Give him/her a food treat                                                                                                                                                                                               | Response to Good Behaviour when Relaxing at six-months | <ul style="list-style-type: none"> <li>• No cuddle or stroke</li> <li>• Cuddle and/or stroke</li> </ul>                                               |

|                                      |                                                                                                                                                                                                      |          |                                                                                                                                                                                                                             |                                                                                                                                                                                                                                                                                                                                                                                                                                                                                    |                                                                      |                                                                                                                                                                              |
|--------------------------------------|------------------------------------------------------------------------------------------------------------------------------------------------------------------------------------------------------|----------|-----------------------------------------------------------------------------------------------------------------------------------------------------------------------------------------------------------------------------|------------------------------------------------------------------------------------------------------------------------------------------------------------------------------------------------------------------------------------------------------------------------------------------------------------------------------------------------------------------------------------------------------------------------------------------------------------------------------------|----------------------------------------------------------------------|------------------------------------------------------------------------------------------------------------------------------------------------------------------------------|
| <b>him/her to,<br/>I/we would...</b> | Ignore<br>him/her<br>Stroke<br>him/her<br>Cuddle<br>him/her<br>Not<br>applicable,<br>he/she has<br>not generally<br>behaved in a<br>way I would<br>like to<br>encourage<br>Other (please<br>specify) | 6 months | <b>In general,<br/>during the last<br/>seven days,<br/>when I/we<br/>were relaxing at<br/>home with my<br/>puppy and<br/>he/she behaved<br/>in a way that<br/>I/we would<br/>NOT like<br/>him/her to,<br/>I/we would...</b> | Tell him/her<br>off<br>Use a physical<br>reprimand/co<br>rrection (for<br>example<br>smack or tap<br>him/her on<br>nose or<br>bottom)<br>Distract<br>him/her (for<br>example<br>rattle<br>can/loud<br>noise/water<br>spray)<br>Move away<br>from him/her<br>Don't give<br>him/her<br>treats that<br>would<br>normally be<br>given at this<br>time<br>Ignore<br>him/her<br>Physically<br>manipulate<br>him/her (for<br>example, hold<br>still, put<br>him/her into<br>a sit or push | Response to<br>Bad<br>Behaviour<br>when<br>Relaxing at<br>six-months | <ul style="list-style-type: none"> <li>• ≤1 aversive techniques and no timeouts</li> <li>• ≤1 aversive techniques but time-outs</li> <li>• ≥2 aversive techniques</li> </ul> |
|--------------------------------------|------------------------------------------------------------------------------------------------------------------------------------------------------------------------------------------------------|----------|-----------------------------------------------------------------------------------------------------------------------------------------------------------------------------------------------------------------------------|------------------------------------------------------------------------------------------------------------------------------------------------------------------------------------------------------------------------------------------------------------------------------------------------------------------------------------------------------------------------------------------------------------------------------------------------------------------------------------|----------------------------------------------------------------------|------------------------------------------------------------------------------------------------------------------------------------------------------------------------------|

|                                                                                                                                                                                                               |          |                                                                                                                                                                                                                                                                                                                                                        |                                                                                |                                                                                                                       |
|---------------------------------------------------------------------------------------------------------------------------------------------------------------------------------------------------------------|----------|--------------------------------------------------------------------------------------------------------------------------------------------------------------------------------------------------------------------------------------------------------------------------------------------------------------------------------------------------------|--------------------------------------------------------------------------------|-----------------------------------------------------------------------------------------------------------------------|
|                                                                                                                                                                                                               |          | off if he/she jumps up)<br>Play with him/her<br>Stroke him/her<br>Cuddle him/her<br>Hold him/her still<br>Encourage him/her to calm down<br>Let him/her outside into the garden or yard<br>Move him/her to another part of the house<br>Not applicable, he/she has not generally behaved in a way I would like to discourage<br>Other (please specify) |                                                                                |                                                                                                                       |
| <b>In general, during the last seven days, when I was preparing to leave my puppy behind in the house (without human company), and she/he behaved in a way that I/we would like him/her to, I/we would...</b> | 6 months | Verbally praise him/her (for example saying 'good dog')<br>Play with him/her<br>Give him/her a food treat<br>Ignore him/her<br>Stroke him/her<br>Cuddle him/her<br>Not applicable, he/she has not generally                                                                                                                                            | Response to Good Behaviour when Preparing to Leave Without Puppy at six-months | <ul style="list-style-type: none"> <li>• No stroke and/or cuddle</li> <li>• Stroke and/or cuddle mentioned</li> </ul> |

|                                                                                                                                                                                                                   |          | behaved in a way I would like to encourage<br>Other (please specify)                                                                                                                                                                                                                                                                                                                                                                                                                                                                                |                                                                                             |                                                                                                                                                 |
|-------------------------------------------------------------------------------------------------------------------------------------------------------------------------------------------------------------------|----------|-----------------------------------------------------------------------------------------------------------------------------------------------------------------------------------------------------------------------------------------------------------------------------------------------------------------------------------------------------------------------------------------------------------------------------------------------------------------------------------------------------------------------------------------------------|---------------------------------------------------------------------------------------------|-------------------------------------------------------------------------------------------------------------------------------------------------|
| <b>In general, during the last seven days, when I was preparing to leave my puppy behind in the house (without human company), and she/he behaved in a way that I/we would NOT like him/her to, I/we would...</b> | 6 months | <p>Tell him/her off</p> <p>Use a physical reprimand/correction (for example smack or tap him/her on nose or bottom)</p> <p>Distract him/her (for example rattle can/loud noise/water spray)</p> <p>Move away from him/her</p> <p>Don't give him/her treats that would normally be given at this time</p> <p>Ignore him/her</p> <p>Physically manipulate him/her (for example, hold still, put him/her into a sit or push off if he/she jumps up)</p> <p>Play with him/her</p> <p>Stroke him/her</p> <p>Cuddle him/her</p> <p>Hold him/her still</p> | <p>Response to Bad</p> <p>Behaviour when Preparing to Leave without Puppy at six-months</p> | <ul style="list-style-type: none"> <li>• ≤1 aversive technique</li> <li>• ≥2 aversive techniques</li> <li>• Not applicable mentioned</li> </ul> |

|                                                                                                                                                                                                                                                                                                                |          |                                                                                                                                                                                                                                                                                                                                |                                                                                   |                                                                                                                        |
|----------------------------------------------------------------------------------------------------------------------------------------------------------------------------------------------------------------------------------------------------------------------------------------------------------------|----------|--------------------------------------------------------------------------------------------------------------------------------------------------------------------------------------------------------------------------------------------------------------------------------------------------------------------------------|-----------------------------------------------------------------------------------|------------------------------------------------------------------------------------------------------------------------|
|                                                                                                                                                                                                                                                                                                                |          | <p>Encourage him/her to calm down</p> <p>Let him/her outside into the garden or yard</p> <p>Move him/her to another part of the house</p> <p>Give him/her a food treat</p> <p>Not applicable, he/she has not generally behaved in a way I would like to discourage</p> <p>Other (please specify)</p>                           |                                                                                   |                                                                                                                        |
| <p><b>In general, during the last seven days, when I was preparing to leave the house WITH my puppy (for example putting on coat, picking up keys, picking up lead or harness), and my puppy knew he/she was coming too and he/she behaved in a way that I/we would NOT like him/her to, I/we would...</b></p> | 6 months | <p>Tell him/her off</p> <p>Use a physical reprimand/correction (for example smack or tap him/her on nose or bottom)</p> <p>Distract him/her (for example rattle can/loud noise/water spray)</p> <p>Move away from him/her</p> <p>Don't give him/her treats that would normally be given at this time</p> <p>Ignore him/her</p> | <p>Response to Bad Behaviour when Preparing to Leave with Puppy at six-months</p> | <ul style="list-style-type: none"> <li>• No aversive techniques*</li> <li>• One or more aversive techniques</li> </ul> |

---

Physically  
 manipulate  
 him/her (for  
 example, hold  
 still, put  
 him/her into  
 a sit or push  
 off if he/she  
 jumps up)  
 Play with  
 him/her  
 Stroke  
 him/her  
 Cuddle  
 him/her  
 Hold him/her  
 still  
 Encourage  
 him/her to  
 calm down  
 Let him/her  
 outside into  
 the garden or  
 yard  
 Move  
 him/her to  
 another part  
 of the house  
 Give him/her  
 a food treat  
 Not  
 applicable,  
 he/she has  
 not generally  
 behaved in a  
 way I would  
 like to  
 discourage  
 Other (please  
 specify)

---

|                                                                                                         |          |                                                                                                                   |                                       |                                                                                                                                                                                                                                         |
|---------------------------------------------------------------------------------------------------------|----------|-------------------------------------------------------------------------------------------------------------------|---------------------------------------|-----------------------------------------------------------------------------------------------------------------------------------------------------------------------------------------------------------------------------------------|
| <b>During the last seven days, when left at home without human company my puppy was usually left...</b> | 6 months | Confined to his/her outside kennel<br>Confined to his/her indoor kennel<br>Outside, with free range of the garden | Left Alone<br>Access at<br>six-months | <ul style="list-style-type: none"> <li>• Confined to his/her indoor crate/outdoor kennel</li> <li>• Restricted to one room/area of the home</li> <li>• With free range of house OR in the house with access to the garden/OR</li> </ul> |
|---------------------------------------------------------------------------------------------------------|----------|-------------------------------------------------------------------------------------------------------------------|---------------------------------------|-----------------------------------------------------------------------------------------------------------------------------------------------------------------------------------------------------------------------------------------|

---

|                                                                               |          |                                                                                                                                                                                                                             |                                        |                                                                                                                                                                                                                                             |
|-------------------------------------------------------------------------------|----------|-----------------------------------------------------------------------------------------------------------------------------------------------------------------------------------------------------------------------------|----------------------------------------|---------------------------------------------------------------------------------------------------------------------------------------------------------------------------------------------------------------------------------------------|
|                                                                               |          | Restricted to one room/area of the home<br>With free range of the house<br>In the house with access to garden<br>Other (please specify)                                                                                     |                                        | outside, with free range of the garden                                                                                                                                                                                                      |
| <b>In general, during the last seven days, my puppy has slept...</b>          | 6 months | Indoors, in a bedroom with human company<br>Indoors, in a room without human company<br>Outdoors, in an outbuilding (for example stable or barn)<br>Outdoors, in a kennel or small sheltered area<br>Other (please specify) | Sleeping Location Type at six-months   | <ul style="list-style-type: none"> <li>• Indoors, in a bedroom with human company (With human company)</li> <li>• Indoors, in a room without human company/Outdoors, in a kennel or small sheltered area (Without human company)</li> </ul> |
| <b>In general, during the last seven days, my puppy has slept...</b>          | 6 months | On the floor<br>On furniture (other than a bed)<br>On a human bed<br>In a crate/kennel<br>On a dog bed<br>I don't know<br>Other (please specify)                                                                            | Normal Sleeping Location at six-months | <ul style="list-style-type: none"> <li>• Only dog bed, floor, other</li> <li>• Mention crate (no human bed or furniture)</li> <li>• Mention human bed and/or furniture</li> </ul>                                                           |
| <b>In general, during the last seven days, when I or other members of the</b> | 6 months | Verbally praise him/her (for example                                                                                                                                                                                        | Response to Good Behaviour when No     | <ul style="list-style-type: none"> <li>• No stroke and/or cuddle</li> <li>• Stroke and/or cuddle</li> </ul>                                                                                                                                 |

|                                                                                                                                                                                                                      |                                                                                                                                                                                                                                                                  |                                                                                                                                                                                                                                                                                                                      |                                                                  |                                                                                                                                                  |
|----------------------------------------------------------------------------------------------------------------------------------------------------------------------------------------------------------------------|------------------------------------------------------------------------------------------------------------------------------------------------------------------------------------------------------------------------------------------------------------------|----------------------------------------------------------------------------------------------------------------------------------------------------------------------------------------------------------------------------------------------------------------------------------------------------------------------|------------------------------------------------------------------|--------------------------------------------------------------------------------------------------------------------------------------------------|
| <p><b>household were not paying attention to my puppy, and he/she behaved in a way that I/we would like him/her to, I/we would...</b></p>                                                                            | <p>saying 'good dog')<br/> Play with him/her<br/> Give him/her a food treat<br/> Ignore him/her<br/> Stroke him/her<br/> Cuddle him/her<br/> Not applicable, he/she has not generally behaved in a way I would like to encourage<br/> Other (please specify)</p> | <p>Attention at six-months</p>                                                                                                                                                                                                                                                                                       |                                                                  |                                                                                                                                                  |
| <p><b>In general, during the last seven days, when I or other members of the household were not paying attention to my puppy, and he/she behaved in a way that I/we would NOT like him/her to, I/we would...</b></p> | <p>6 months</p>                                                                                                                                                                                                                                                  | <p>Tell him/her off<br/> Use a physical reprimand/correction (for example smack or tap him/her on nose or bottom)<br/> Distract him/her (for example rattle can/loud noise/water spray)<br/> Move away from him/her<br/> Don't give him/her treats that would normally be given at this time<br/> Ignore him/her</p> | <p>Response to Bad Behaviour when No Attention at six-months</p> | <ul style="list-style-type: none"> <li>• ≤1 aversive techniques</li> <li>• ≥2 aversive techniques</li> <li>• Not applicable mentioned</li> </ul> |

|                                                                                                                                                                                                                                                                                          |          |                                                                                                                                                                                                                                                                                                                                                                                                                                                                                                                                                                   |                                                                                  |                                                                                                                                        |
|------------------------------------------------------------------------------------------------------------------------------------------------------------------------------------------------------------------------------------------------------------------------------------------|----------|-------------------------------------------------------------------------------------------------------------------------------------------------------------------------------------------------------------------------------------------------------------------------------------------------------------------------------------------------------------------------------------------------------------------------------------------------------------------------------------------------------------------------------------------------------------------|----------------------------------------------------------------------------------|----------------------------------------------------------------------------------------------------------------------------------------|
|                                                                                                                                                                                                                                                                                          |          | Physically<br>manipulate<br>him/her (for<br>example, hold<br>still, put<br>him/her into<br>a sit or push<br>off if he/she<br>jumps up)<br>Play with<br>him/her<br>Stroke<br>him/her<br>Cuddle<br>him/her<br>Hold him/her<br>still<br>Encourage<br>him/her to<br>calm down<br>Let him/her<br>outside into<br>the garden or<br>yard<br>Move<br>him/her to<br>another part<br>of the house<br>Give him/her<br>a food treat<br>Not<br>applicable,<br>he/she has<br>not generally<br>behaved in a<br>way I would<br>like to<br>discourage<br>Other (please<br>specify) |                                                                                  |                                                                                                                                        |
| <b>In general,<br/>         during the last<br/>         seven days,<br/>         when my puppy<br/>         was separated<br/>         (for example by<br/>         a closed or baby<br/>         gate) from<br/>         myself or<br/>         another<br/>         member of the</b> | 6 months | Tell him/her<br>off<br>Use a physical<br>reprimand/co<br>rrection (for<br>example<br>smack or tap<br>him/her on<br>nose or<br>bottom)                                                                                                                                                                                                                                                                                                                                                                                                                             | Response to<br>Bad<br>Behaviour<br>when<br>Separated<br>at Home at<br>six-months | <ul style="list-style-type: none"> <li>• ≤1 aversive techniques</li> <li>• ≥2 aversive techniques</li> <li>• Not applicable</li> </ul> |

---

**household  
while in the  
home, and  
he/she behaved  
in a way that  
I/we would  
NOT like  
him/her to,  
I/we would...**

Distract  
him/her (for  
example  
rattle  
can/loud  
noise/water  
spray)  
Move away  
from him/her  
Don't give  
him/her  
treats that  
would  
normally be  
given at this  
time  
Ignore  
him/her  
Physically  
manipulate  
him/her (for  
example, hold  
still, put  
him/her into  
a sit or push  
off if he/she  
jumps up)  
Play with  
him/her  
Stroke  
him/her  
Cuddle  
him/her  
Hold him/her  
still  
Encourage  
him/her to  
calm down  
Let him/her  
outside into  
the garden or  
yard  
Move  
him/her to  
another part  
of the house  
Give him/her  
a food treat  
Not  
applicable,  
he/she has

---

|                                                                                                                                                                                                                         |          |                                                                                                                                                                                                                                                                                            |                                                    |                                                                                                                                                              |
|-------------------------------------------------------------------------------------------------------------------------------------------------------------------------------------------------------------------------|----------|--------------------------------------------------------------------------------------------------------------------------------------------------------------------------------------------------------------------------------------------------------------------------------------------|----------------------------------------------------|--------------------------------------------------------------------------------------------------------------------------------------------------------------|
|                                                                                                                                                                                                                         |          | not generally behaved in a way I would like to discourage<br>Other (please specify)                                                                                                                                                                                                        |                                                    |                                                                                                                                                              |
| <b>In general, during the last seven days, when my puppy had been left at home WITHOUT human company and I/we returned to the house, and he/she behaved in a way that I/we would NOT like him/her to, I/we would...</b> | 6 months | Tell him/her off                                                                                                                                                                                                                                                                           | Response to Bad                                    | <ul style="list-style-type: none"> <li>• ≤1 aversive techniques</li> </ul>                                                                                   |
|                                                                                                                                                                                                                         |          | Use a physical reprimand/correction (for example smack or tap him/her on nose or bottom)                                                                                                                                                                                                   | Behaviour upon Return at six-months                | <ul style="list-style-type: none"> <li>• ≥2 aversive techniques</li> <li>• Not applicable</li> </ul>                                                         |
|                                                                                                                                                                                                                         |          | Distract him/her (for example rattle can/loud noise/water spray)                                                                                                                                                                                                                           | Response to Bad                                    | <ul style="list-style-type: none"> <li>• No greet or tell off</li> <li>• Greet and/or tell off</li> <li>• No greet or tell off but not applicable</li> </ul> |
|                                                                                                                                                                                                                         |          | Move away from him/her<br>Don't give him/her treats that would normally be given at this time<br>Ignore him/her<br>Physically manipulate him/her (for example, hold still, put him/her into a sit or push off if he/she jumps up)<br>Play with him/her<br>Stroke him/her<br>Cuddle him/her | Behaviour upon Return at six-months<br>–<br>'Fuss' | <ul style="list-style-type: none"> <li>• No play/stroke/cuddle/greet</li> <li>• Play/stroke/cuddle/greet</li> <li>• Not applicable</li> </ul>                |

|                                                                              |                                                                                                                                                                                                                                                                                                 |                         |                                                                                                                                                                                                                                  |
|------------------------------------------------------------------------------|-------------------------------------------------------------------------------------------------------------------------------------------------------------------------------------------------------------------------------------------------------------------------------------------------|-------------------------|----------------------------------------------------------------------------------------------------------------------------------------------------------------------------------------------------------------------------------|
|                                                                              | Hold him/her still<br>Encourage him/her to calm down<br>Let him/her outside into the garden or yard<br>Move him/her to another part of the house<br>Give him/her a food treat<br>Not applicable, he/she has not generally behaved in a way I would like to discourage<br>Other (please specify) |                         |                                                                                                                                                                                                                                  |
| <b>In the last two months I have taken my puppy to a veterinary practice</b> | Yes<br>No, but a vet visited my home instead/there is a vet in the household<br>Not at all, my puppy has not seen a vet in the last two months                                                                                                                                                  | Vet Visit at six-months | <ul style="list-style-type: none"> <li>• A visit of any type (Yes or No, but a vet visited my home instead/there is a vet in the household)</li> <li>• Not at all, my puppy has not seen a vet in the last two months</li> </ul> |

\* Aversive techniques: Tell him/her off, physically reprimand/correct him/her (for example smack or tap on nose or bottom), distract him/her (for example with a rattled can/loud noise/water spray), physically manipulate him/her (for example hold still, put into a sit, or push off if he/she jumps up), hold him/her still

**Table S2. Variables that reached threshold significance of  $P \leq 0.200$  in univariable analysis for risk factors (n = 145).**

| Variable name | Categories | Reference Category | P-value | OR | CI |
|---------------|------------|--------------------|---------|----|----|
|---------------|------------|--------------------|---------|----|----|

|                                                  |                                                                   |                              |        |       |                         |
|--------------------------------------------------|-------------------------------------------------------------------|------------------------------|--------|-------|-------------------------|
| <b>Dog Breed (Combined categories)</b>           | Crossbreeds                                                       | Unknown/known breeds/crosses | 0.020  |       |                         |
|                                                  | Labrador Retriever                                                |                              | 0.005  | 0.172 | 0.05-                   |
|                                                  | Other pure breeds                                                 |                              | 0.188  | 0.618 | 0.594-1.264             |
| <b>Kennel Club Group (Combined Categories)</b>   | None and Unknown                                                  | None and Unknown             | 0.001  |       |                         |
|                                                  | Working, Hound, Terrier, Utility and Toy                          |                              | 0.900  | 1.055 | 0.457-2.433             |
|                                                  | Pastoral                                                          |                              | 0.073  | 0.371 |                         |
|                                                  | Gundog                                                            |                              | 0.001  | 0.218 | 0.126-1.095-0.092-0.517 |
| <b>Pure v Cross Breed</b>                        | Pure breed                                                        | Pure breed                   |        |       |                         |
|                                                  | Cross breed                                                       |                              | 0.057  | 1.967 | 0.980-3.949             |
| <b>Owner Age</b>                                 | 16-34 years                                                       | 16-34 years                  |        |       |                         |
|                                                  | 35 years and older                                                |                              | <0.001 | 5.349 | 2.025-14.126            |
| <b>Marital Status Combo</b>                      | Single & Widowed                                                  | Single & Widowed             | 0.045  |       |                         |
|                                                  | Common Law                                                        |                              | 0.395  | 1.76  | 0.479-                  |
|                                                  | Married & Civil Partnered                                         |                              | 0.131  | 0.512 | 6.467                   |
|                                                  | Divorced/Separated                                                |                              | 0.081  | 0.21  | 0.215-1.22-0.036-1.21   |
| <b>Home Location Combo Plus</b>                  | City or urban area                                                | City or urban area           | 0.198  |       |                         |
|                                                  | Suburban area                                                     |                              | 0.072  | 0.395 | 0.144-                  |
|                                                  | Village or small town or Rural or remote                          |                              | 0.191  | 0.549 | 1.086-0.224-1.348       |
| <b>Maximum Period Left at ≤16 weeks</b>          | Not Left Alone                                                    | Not Left Alone               | 0.063  |       |                         |
|                                                  | Less than 1 hour and                                              |                              | 0.435  | 1.5   | 0.542-4.155             |
|                                                  | One or more hours but less than three hours                       |                              |        |       |                         |
|                                                  | Three or more hours but less than six hours and Six or more hours |                              | 0.042  | 2.946 | 1.042-8.335             |
| <b>Type of Enclosed Space Combo at ≤16 weeks</b> | Not enclosed                                                      | Not enclosed                 | <0.001 |       |                         |
|                                                  | Any crate experience                                              |                              | <0.001 | 0.176 | 0.069-                  |
|                                                  | Other                                                             |                              | 0.420  | 0.583 | 0.45-0.158-2.159        |
| <b>Reason Enclosed at ≤16 weeks</b>              | Not enclosed                                                      | Not enclosed                 | 0.003  |       |                         |
|                                                  | Calm and/or safe only (plus sleep only) and housetrain            |                              | 0.001  | 0.195 | 0.076-0.505             |
|                                                  | Diff combinations but include separate from                       |                              | 0.018  | 0.259 | 0.084-0.794             |

|                                                        |                                                                                                                                                                                                                                                        |                    |        |       |             |
|--------------------------------------------------------|--------------------------------------------------------------------------------------------------------------------------------------------------------------------------------------------------------------------------------------------------------|--------------------|--------|-------|-------------|
|                                                        | others or keep still if naughty                                                                                                                                                                                                                        |                    |        |       |             |
| <b>Frequency Enclosed at ≤16 weeks</b>                 | Not enclosed                                                                                                                                                                                                                                           | Not enclosed       | <0.001 |       |             |
|                                                        | Day Only (not mention overnight)                                                                                                                                                                                                                       |                    | 0.093  | 0.407 | 0.142-1.163 |
|                                                        | Combinations of time but experience of being enclosed overnight                                                                                                                                                                                        |                    | <0.001 | 0.139 |             |
|                                                        |                                                                                                                                                                                                                                                        |                    |        |       | 0.052-0.369 |
| <b>Maximum Hours Sleep at Night at ≤16 weeks</b>       | 6 hours to 8hours                                                                                                                                                                                                                                      | 6 hours to 8 hours | 0.018  |       |             |
|                                                        | 9 hours                                                                                                                                                                                                                                                |                    | 0.036  | 0.375 | 0.15-       |
|                                                        | 10 hours and over                                                                                                                                                                                                                                      |                    | 0.007  | 0.161 | 0.94        |
|                                                        | Unspecified                                                                                                                                                                                                                                            |                    | 0.415  | 0.7   | 0.043-0.605 |
|                                                        |                                                                                                                                                                                                                                                        |                    |        |       | 0.297-1.649 |
| <b>Minimum Hours Sleep at Night at ≤16 weeks</b>       | 0 hours - 4 hours                                                                                                                                                                                                                                      | 0 hours - 4 hours  | 0.068  |       |             |
|                                                        | 5 hours                                                                                                                                                                                                                                                |                    | 0.180  | 2.554 | 0.648-      |
|                                                        | 6 hours                                                                                                                                                                                                                                                |                    | 0.911  | 1.061 | 10.059      |
|                                                        | 7 hours                                                                                                                                                                                                                                                |                    | 0.275  | 0.546 | 0.375-      |
|                                                        | 8 hours or more                                                                                                                                                                                                                                        |                    | 0.042  | 0.273 | 3.006       |
|                                                        | Unspecified                                                                                                                                                                                                                                            |                    | 0.789  | 0.867 | 0.184-1.619 |
|                                                        |                                                                                                                                                                                                                                                        |                    |        |       | 0.078-0.954 |
|                                                        |                                                                                                                                                                                                                                                        |                    |        |       | 0.304-2.474 |
| <b>Maximum Hours Sleep During the Day at ≤16 weeks</b> | 2 hours - 3 hours                                                                                                                                                                                                                                      | 2 hours - 3 hours  | 0.116  |       |             |
|                                                        | 4 hours                                                                                                                                                                                                                                                |                    | 0.184  | 0.457 | 0.144-      |
|                                                        | 5 hours                                                                                                                                                                                                                                                |                    | 0.073  | 0.286 | 1.449       |
|                                                        | 6 hours                                                                                                                                                                                                                                                |                    | 0.158  | 0.39  | 0.073-      |
|                                                        | 7 hours and over                                                                                                                                                                                                                                       |                    | 0.954  | 0.964 | 1.124       |
|                                                        | Unspecified                                                                                                                                                                                                                                            |                    | 0.747  | 1.169 | 0.105-1.442 |
|                                                        |                                                                                                                                                                                                                                                        |                    |        |       | 0.283-3.284 |
|                                                        |                                                                                                                                                                                                                                                        |                    |        |       | 0.453-3.014 |
| <b>Method of settling at ≤16 weeks</b>                 | Sleeping in room (By having him/her in a bedroom with human company OR By sleeping in another room in the house with him/her (for example sleeping in the living room) OR By waiting for him/her to be asleep before going to bed in a different room) | Sleeping in room   |        |       |             |

|                                                                |                                                                                                                                                                        |                                         |                                  |                         |                                            |
|----------------------------------------------------------------|------------------------------------------------------------------------------------------------------------------------------------------------------------------------|-----------------------------------------|----------------------------------|-------------------------|--------------------------------------------|
|                                                                | Leaving Alone<br>(By leaving him/her in a room/area without human company OR<br>By leaving him/her in an outbuilding (for example kennel, stable))                     |                                         | 0.021                            | 0.45                    | 0.228-0.889                                |
| <b>Access to People at ≤16 weeks</b>                           | No<br>Yes                                                                                                                                                              | No                                      | 0.008                            | 3.136                   | 1.343-7.324                                |
| <b>Sleep Location at ≤16 weeks</b>                             | Anything not including kennel<br>Kennel plus something<br>Kennel only<br>Persons bed at all                                                                            | Anything not including kennel           | 0.001<br>0.340<br>0.002<br>0.330 | 0.591<br>0.273<br>1.92  | 0.2-1.742<br>0.118-0.631<br>0.516-7.144    |
| <b>Housetraining Progression at ≤16 weeks</b>                  | Zero to three accidents per week<br>Is ongoing, but there are still four or more accidents per week                                                                    | Zero to three accidents per week        | <0.001                           | 4.356                   | 1.861-10.197                               |
| <b>House Train Method at ≤16 weeks</b>                         | Taken out regularly and/or praised<br>Telling off mentioned and/or praise not mentioned                                                                                | Taken out regularly and/or praised      | 0.107                            | 2.164                   | 0.846-5.531                                |
| <b>Puppy Training Class House Training Info at ≤16 weeks</b>   | No classes<br>Given information about this, but NOT shown how to do this<br>Shown how to do this, AND/OR given separate information about this<br>This was not covered | No classes                              | 0.060<br>0.810<br>0.103<br>0.116 | 1.122<br>2.848<br>0.534 | 0.438-2.875<br>0.811-10.008<br>0.244-1.167 |
| <b>Puppy Class Run by Vet Practice at ≤16 weeks</b>            | No classes<br>No<br>Yes                                                                                                                                                | No classes                              | 0.082<br>0.029<br>0.273          | 3.327<br>1.483          | 1.132-9.779<br>0.733-2.999                 |
| <b>Training Reward – Kibble or dog food treat at ≤16 weeks</b> | No use of kibble and/or dog food treats<br>Kibble and/or dog food treats                                                                                               | No use of kibble and/or dog food treats | 0.003                            | 3.529                   | 1.521-8.189                                |

|                                                                                                        |                                                                                                                                                 |                                                               |                                  |                         |                                           |
|--------------------------------------------------------------------------------------------------------|-------------------------------------------------------------------------------------------------------------------------------------------------|---------------------------------------------------------------|----------------------------------|-------------------------|-------------------------------------------|
| <b>Correction Method at ≤16 weeks</b>                                                                  | Move away, withhold treats, ignore, don't use anything, other<br>Tell off, physical, distraction, manipulation, hold still (may use others too) | Move away, withhold treats, ignore, don't use anything, other | 0.010                            | 2.591                   | 1.251-5.367                               |
| <b>Experience Gunshot at six-months</b>                                                                | Definitely No<br>Definitely Yes<br>I don't know                                                                                                 | Definitely No                                                 | 0.105<br>0.049<br>0.261          | 0.479<br>0.514          | 0.230-0.996<br>0.161-1.639                |
| <b>Experience Raised Voices at six-months</b>                                                          | Definitely No<br>Definitely Yes                                                                                                                 | Definitely No                                                 | 0.043                            | 1.935                   | 1.022-3.667                               |
| <b>Nights Separated at six-months</b>                                                                  | Not stayed away<br>One to five nights<br>6-10 nights<br>11 or more nights                                                                       | Not stayed away                                               | 0.106<br>0.475<br>0.086<br>0.131 | 1.325<br>2.981<br>0.294 | 0.613-2.866<br>0.856-10.377<br>0.06-1.438 |
| <b>Response to Good Behaviour when Relaxing at six-months</b>                                          | No cuddle or stroke<br>Cuddle and/or stroke                                                                                                     | No cuddle or stroke                                           | 0.062                            | 3.033                   | 0.944-9.744                               |
| <b>Response to Bad Behaviour when Relaxing at six-months</b>                                           | ≤1 aversive techniques<br>≤1 aversive techniques but time-outs<br>≥2 aversive techniques                                                        | ≤1 aversive techniques                                        | 0.039<br>0.018<br>0.018          | 3<br>3.25               | 1.205-7.47<br>1.227-8.605                 |
| <b>Response to Good Behaviour when Preparing to Leave Without Puppy at six-months (Includes 4 NAs)</b> | No stroke and/or cuddle<br>Stroke and/or cuddle mentioned                                                                                       | No stroke and/or cuddle                                       | 0.010                            | 2.337                   | 1.228-4.448                               |
| <b>Response to Bad Behaviour when Preparing to</b>                                                     | ≤1 aversive technique<br>≥2 aversive techniques<br>Not applicable mentioned                                                                     | ≤1 aversive technique                                         | 0.002<br>0.039<br>0.021          | 3.5<br>0.442            | 1.062-11.534<br>0.221-0.883               |

|                                                                                   |                                                                                                                |                                                               |       |       |             |
|-----------------------------------------------------------------------------------|----------------------------------------------------------------------------------------------------------------|---------------------------------------------------------------|-------|-------|-------------|
| <b>Leave without Puppy at six-months</b>                                          |                                                                                                                |                                                               |       |       |             |
| <b>Response to Bad Behaviour when Preparing to Leave with Puppy at six-months</b> | No aversive techniques                                                                                         | ≤1 aversive technique                                         | 0.043 | 1.927 | 1.02-3.643  |
|                                                                                   | One or more aversive techniques                                                                                |                                                               |       |       |             |
| <b>Left Alone Access at six-months</b>                                            | Confined to his/her indoor crate/outdoor kennel                                                                | Confined to his/her indoor crate/outdoor kennel               | 0.048 |       |             |
|                                                                                   | Restricted to one room/area of the home                                                                        |                                                               | 0.018 | 2.31  | 1.156-4.615 |
|                                                                                   | With free range of house OR in the house with access to the garden/OR outside, with free range of the garden   |                                                               | 0.117 | 2.117 | 0.829-5.409 |
|                                                                                   |                                                                                                                |                                                               |       |       |             |
| <b>Sleeping Location Type at six-months</b>                                       | Indoors, in a bedroom with human company (With human company)                                                  | Indoors, in a bedroom with human company (With human company) |       |       |             |
|                                                                                   | Indoors, in a room without human company/Outdoors, in a kennel or small sheltered area (Without human company) |                                                               | 0.013 | 0.432 | 0.223-0.837 |
| <b>Normal Sleeping Location at six-months</b>                                     | Only dog bed, floor, other                                                                                     | Only dog bed, floor, other                                    | 0.001 |       |             |
|                                                                                   | Mention crate (no human bed or furniture)                                                                      |                                                               | 0.951 | 1.027 | 0.442-2.383 |
|                                                                                   | Mention human bed and/or furniture                                                                             |                                                               | 0.004 | 3.896 | 1.551-9.783 |
| <b>Access People at Night at six-months</b>                                       | No                                                                                                             | No                                                            |       |       |             |
|                                                                                   | Yes                                                                                                            |                                                               | 0.148 | 1.624 | 0.841-3.135 |
| <b>Response to Good Behaviour when No Attention at six-months</b>                 | No stroke and/or cuddle                                                                                        | No stroke and/or cuddle                                       | 0.04  | 2.19  | 1.036-4.627 |
|                                                                                   | Stroke and/or cuddle                                                                                           |                                                               |       |       |             |
| <b>Response to Bad</b>                                                            | ≤1 aversive techniques                                                                                         | ≤1 aversive techniques                                        | 0.005 |       |             |
|                                                                                   | ≥2 aversive techniques                                                                                         |                                                               | 0.003 | 3.516 |             |

|                                                                       |                                                                                                       |                          |       |       |                            |
|-----------------------------------------------------------------------|-------------------------------------------------------------------------------------------------------|--------------------------|-------|-------|----------------------------|
| <b>Behaviour when No Attention at six-months</b>                      | Not applicable mentioned                                                                              |                          | 0.446 | 0.684 | 1.528-8.091<br>0.257-1.817 |
| <b>Response to Bad Behaviour when Separated at Home at six-months</b> | ≤1 aversive techniques                                                                                | ≤1 aversive techniques   | 0.015 |       |                            |
|                                                                       | ≥2 aversive techniques                                                                                |                          | 0.111 | 2.708 | 0.796-                     |
|                                                                       | Not applicable                                                                                        |                          | 0.033 | 0.44  | 9.211<br>0.207-0.936       |
| <b>Puppy Behavioural Problem at six-months</b>                        | No                                                                                                    | No                       |       |       |                            |
|                                                                       | Yes                                                                                                   |                          | 0.013 | 2.553 | 1.220-5.341                |
| <b>Response to Good Behaviour upon Return at six-months</b>           | No cuddle mentioned                                                                                   | No cuddle mentioned      |       |       |                            |
|                                                                       | Cuddle mentioned                                                                                      |                          | 0.002 | 2.826 | 1.458-5.476                |
| <b>Response to Bad Behaviour upon Return at six-months</b>            | ≤1 aversive techniques                                                                                | ≤1 aversive techniques   | 0.003 |       |                            |
|                                                                       | ≥2 aversive techniques                                                                                |                          |       |       |                            |
|                                                                       | Not applicable                                                                                        |                          | 0.052 | 8.143 | 0.985-67.303               |
|                                                                       |                                                                                                       |                          | 0.011 | 0.425 | 0.219-0.823                |
| <b>Response to Bad Behaviour upon Return at six-months</b>            | No greet or tell off                                                                                  | No greet or tell off     | 0.001 |       |                            |
|                                                                       | Greet and/or tell off                                                                                 |                          | 0.033 | 2.485 | 1.074-                     |
|                                                                       | No greet or tell off but NA                                                                           |                          | 0.171 | 0.571 | 5.748<br>0.256-1.275       |
| <b>- Greet/Tell Off</b>                                               |                                                                                                       |                          |       |       |                            |
| <b>Response to Bad Behaviour upon Return at six-months</b>            | No                                                                                                    | No                       | 0.001 |       |                            |
|                                                                       | play/stroke/cuddle/greet                                                                              | play/stroke/cuddle/greet | 0.063 | 2.237 | 0.956-                     |
|                                                                       | Play/stroke/cuddle/greet                                                                              |                          | 0.053 | 0.481 | 5.234<br>0.229-1.01        |
| <b>- 'Fuss'</b>                                                       |                                                                                                       |                          |       |       |                            |
| <b>Showing Teething at six-months</b>                                 | No                                                                                                    | No                       |       |       |                            |
|                                                                       | Yes                                                                                                   |                          | 0.094 | 1.771 | 0.908-3.457                |
| <b>Vet Visit at six-months</b>                                        | Some visit of any type (Yes or No, but a vet visited my home instead/there is a vet in the household) | Yes                      |       |       |                            |
|                                                                       |                                                                                                       |                          | 0.121 | 0.564 | 0.273-1.164                |

---

Not at all, my puppy has  
not seen a vet in the last  
two months

---
